# Supplementary material for: How Food Controls Aggression in Drosophila
Source: PLoS One. 2014 Aug 27;9(8):e105626. doi: 10.1371/journal.pone.0105626 (PMC4146546; doi:10.1371/journal.pone.0105626)
Supplement: Table S1 — (XLSX) [file pone.0105626.s009.xlsx]

## Sheet: Sheet1
first three minutes
In the presence of food
Lunges (Food)
minute 1 vs. minute 2	-11.84	No	ns	0.1341
minute 1 vs. minute 3	-14.24	Yes	*	0.0474
minute 2 vs. minute 3	-2.397	No	ns	> 0.9999
One-Wing Extension (Food)
minute 1 vs. minute 2	16.24	Yes	*	0.0257
minute 1 vs. minute 3	19.5	Yes	**	0.0048
minute 2 vs. minute 3	3.265	No	ns	> 0.9999
AGAROSE
Lunges (Agarose)
minute 1 vs. minute 2	1.288	No	ns	> 0.9999
minute 1 vs. minute 3	-6.061	No	ns	0.3898
minute 2 vs. minute 3	-7.348	No	ns	0.199
One-Wing Extension (Agarose)
minute 1 vs. minute 2	14.63	No	ns	0.0767
minute 1 vs. minute 3	20.77	Yes	**	0.0046
minute 2 vs. minute 3	6.141	No	ns	> 0.9999
