# Supplementary material for: How Food Controls Aggression in Drosophila
Source: PLoS One. 2014 Aug 27;9(8):e105626. doi: 10.1371/journal.pone.0105626 (PMC4146546; doi:10.1371/journal.pone.0105626)
Supplement: Table S4 — (XLSX) [file pone.0105626.s012.xlsx]

## Sheet: Circling (M-M Courtship)
Circling (M-M Courtship)
Number of families	1
Number of comparisons per family	78
Alpha	0.05
Dunn's multiple comparisons test	Mean rank diff.	Significant?	Summary	Adjusted P Value
0 vs. 2	-59.55	No	ns	> 0.9999
0 vs. 4	-54.79	No	ns	> 0.9999
0 vs. 10	-24.27	No	ns	> 0.9999
0 vs. 15	-46.43	No	ns	> 0.9999
0 vs. 20	-69.03	No	ns	> 0.9999
0 vs. 25	-88.14	No	ns	0.9614
0 vs. 30	-57.33	No	ns	> 0.9999
0 vs. 35	-129.6	Yes	**	0.0058
0 vs. 40	-89.67	No	ns	0.5081
0 vs. 45	-100.3	No	ns	0.1091
0 vs. 50	-190.3	Yes	****	< 0.0001
0 vs. 55	-121.8	Yes	*	0.0218
2 vs. 4	4.764	No	ns	> 0.9999
2 vs. 10	35.29	No	ns	> 0.9999
2 vs. 15	13.13	No	ns	> 0.9999
2 vs. 20	-9.472	No	ns	> 0.9999
2 vs. 25	-28.58	No	ns	> 0.9999
2 vs. 30	2.221	No	ns	> 0.9999
2 vs. 35	-70.02	No	ns	> 0.9999
2 vs. 40	-30.12	No	ns	> 0.9999
2 vs. 45	-40.71	No	ns	> 0.9999
2 vs. 50	-130.7	Yes	*	0.0204
2 vs. 55	-62.23	No	ns	> 0.9999
4 vs. 10	30.52	No	ns	> 0.9999
4 vs. 15	8.366	No	ns	> 0.9999
4 vs. 20	-14.24	No	ns	> 0.9999
4 vs. 25	-33.35	No	ns	> 0.9999
4 vs. 30	-2.543	No	ns	> 0.9999
4 vs. 35	-74.78	No	ns	> 0.9999
4 vs. 40	-34.88	No	ns	> 0.9999
4 vs. 45	-45.48	No	ns	> 0.9999
4 vs. 50	-135.5	Yes	*	0.011
4 vs. 55	-67	No	ns	> 0.9999
10 vs. 15	-22.16	No	ns	> 0.9999
10 vs. 20	-44.76	No	ns	> 0.9999
10 vs. 25	-63.87	No	ns	> 0.9999
10 vs. 30	-33.07	No	ns	> 0.9999
10 vs. 35	-105.3	No	ns	0.1137
10 vs. 40	-65.41	No	ns	> 0.9999
10 vs. 45	-76	No	ns	> 0.9999
10 vs. 50	-166	Yes	***	0.0002
10 vs. 55	-97.52	No	ns	0.3127
15 vs. 20	-22.6	No	ns	> 0.9999
15 vs. 25	-41.71	No	ns	> 0.9999
15 vs. 30	-10.91	No	ns	> 0.9999
15 vs. 35	-83.15	No	ns	> 0.9999
15 vs. 40	-43.25	No	ns	> 0.9999
15 vs. 45	-53.84	No	ns	> 0.9999
15 vs. 50	-143.8	Yes	*	0.0104
15 vs. 55	-75.36	No	ns	> 0.9999
20 vs. 25	-19.11	No	ns	> 0.9999
20 vs. 30	11.69	No	ns	> 0.9999
20 vs. 35	-60.55	No	ns	> 0.9999
20 vs. 40	-20.65	No	ns	> 0.9999
20 vs. 45	-31.24	No	ns	> 0.9999
20 vs. 50	-121.2	No	ns	0.1216
20 vs. 55	-52.76	No	ns	> 0.9999
25 vs. 30	30.8	No	ns	> 0.9999
25 vs. 35	-41.44	No	ns	> 0.9999
25 vs. 40	-1.534	No	ns	> 0.9999
25 vs. 45	-12.13	No	ns	> 0.9999
25 vs. 50	-102.1	No	ns	0.6009
25 vs. 55	-33.65	No	ns	> 0.9999
30 vs. 35	-72.24	No	ns	0.8752
30 vs. 40	-32.34	No	ns	> 0.9999
30 vs. 45	-42.93	No	ns	> 0.9999
30 vs. 50	-132.9	Yes	**	0.0013
30 vs. 55	-64.46	No	ns	> 0.9999
35 vs. 40	39.9	No	ns	> 0.9999
35 vs. 45	29.31	No	ns	> 0.9999
35 vs. 50	-60.69	No	ns	> 0.9999
35 vs. 55	7.787	No	ns	> 0.9999
40 vs. 45	-10.6	No	ns	> 0.9999
40 vs. 50	-100.6	No	ns	0.4317
40 vs. 55	-32.12	No	ns	> 0.9999
45 vs. 50	-90	No	ns	0.7628
45 vs. 55	-21.52	No	ns	> 0.9999
50 vs. 55	68.48	No	ns	> 0.9999
Circling PER METER (M-M Courtship)
Number of families	1
Number of comparisons per family	78
Alpha	0.05
Dunn's multiple comparisons test	Mean rank diff.	Significant?	Summary	Adjusted P Value
0 vs. 2	-68.51	No	ns	> 0.9999
0 vs. 4	-89.26	No	ns	0.4387
0 vs. 10	-1.863	No	ns	> 0.9999
0 vs. 15	-76.5	No	ns	> 0.9999
0 vs. 20	-38.72	No	ns	> 0.9999
0 vs. 25	-16.72	No	ns	> 0.9999
0 vs. 30	-25.39	No	ns	> 0.9999
0 vs. 35	-96.97	No	ns	0.2371
0 vs. 40	-65.9	No	ns	> 0.9999
0 vs. 45	-8.866	No	ns	> 0.9999
0 vs. 50	-136.7	Yes	**	0.0068
0 vs. 55	-93.68	No	ns	0.4069
2 vs. 4	-20.75	No	ns	> 0.9999
2 vs. 10	66.65	No	ns	> 0.9999
2 vs. 15	-7.986	No	ns	> 0.9999
2 vs. 20	29.79	No	ns	> 0.9999
2 vs. 25	51.79	No	ns	> 0.9999
2 vs. 30	43.12	No	ns	> 0.9999
2 vs. 35	-28.46	No	ns	> 0.9999
2 vs. 40	2.613	No	ns	> 0.9999
2 vs. 45	59.64	No	ns	> 0.9999
2 vs. 50	-68.2	No	ns	> 0.9999
2 vs. 55	-25.17	No	ns	> 0.9999
4 vs. 10	87.4	No	ns	0.5764
4 vs. 15	12.77	No	ns	> 0.9999
4 vs. 20	50.54	No	ns	> 0.9999
4 vs. 25	72.54	No	ns	> 0.9999
4 vs. 30	63.88	No	ns	> 0.9999
4 vs. 35	-7.705	No	ns	> 0.9999
4 vs. 40	23.37	No	ns	> 0.9999
4 vs. 45	80.4	No	ns	0.9855
4 vs. 50	-47.45	No	ns	> 0.9999
4 vs. 55	-4.412	No	ns	> 0.9999
10 vs. 15	-74.63	No	ns	> 0.9999
10 vs. 20	-36.86	No	ns	> 0.9999
10 vs. 25	-14.86	No	ns	> 0.9999
10 vs. 30	-23.52	No	ns	> 0.9999
10 vs. 35	-95.11	No	ns	0.3171
10 vs. 40	-64.03	No	ns	> 0.9999
10 vs. 45	-7.003	No	ns	> 0.9999
10 vs. 50	-134.8	Yes	*	0.01
10 vs. 55	-91.81	No	ns	0.5287
15 vs. 20	37.77	No	ns	> 0.9999
15 vs. 25	59.77	No	ns	> 0.9999
15 vs. 30	51.11	No	ns	> 0.9999
15 vs. 35	-20.47	No	ns	> 0.9999
15 vs. 40	10.6	No	ns	> 0.9999
15 vs. 45	67.63	No	ns	> 0.9999
15 vs. 50	-60.22	No	ns	> 0.9999
15 vs. 55	-17.18	No	ns	> 0.9999
20 vs. 25	22	No	ns	> 0.9999
20 vs. 30	13.34	No	ns	> 0.9999
20 vs. 35	-58.25	No	ns	> 0.9999
20 vs. 40	-27.17	No	ns	> 0.9999
20 vs. 45	29.86	No	ns	> 0.9999
20 vs. 50	-97.99	No	ns	0.8275
20 vs. 55	-54.95	No	ns	> 0.9999
25 vs. 30	-8.663	No	ns	> 0.9999
25 vs. 35	-80.25	No	ns	> 0.9999
25 vs. 40	-49.17	No	ns	> 0.9999
25 vs. 45	7.857	No	ns	> 0.9999
25 vs. 50	-120	No	ns	0.1368
25 vs. 55	-76.95	No	ns	> 0.9999
30 vs. 35	-71.58	No	ns	0.9384
30 vs. 40	-40.51	No	ns	> 0.9999
30 vs. 45	16.52	No	ns	> 0.9999
30 vs. 50	-111.3	Yes	*	0.0249
30 vs. 55	-68.29	No	ns	> 0.9999
35 vs. 40	31.07	No	ns	> 0.9999
35 vs. 45	88.1	No	ns	0.5527
35 vs. 50	-39.74	No	ns	> 0.9999
35 vs. 55	3.293	No	ns	> 0.9999
40 vs. 45	57.03	No	ns	> 0.9999
40 vs. 50	-70.82	No	ns	> 0.9999
40 vs. 55	-27.78	No	ns	> 0.9999
45 vs. 50	-127.8	Yes	*	0.0191
45 vs. 55	-84.81	No	ns	0.8923
50 vs. 55	43.04	No	ns	> 0.9999
