# Supplementary material for: How Food Controls Aggression in Drosophila
Source: PLoS One. 2014 Aug 27;9(8):e105626. doi: 10.1371/journal.pone.0105626 (PMC4146546; doi:10.1371/journal.pone.0105626)
Supplement: Table S5 — (XLSX) [file pone.0105626.s013.xlsx]

## Sheet: Encounter duration
Number of families	1
Number of comparisons per family	78
Alpha	0.05
Dunn's multiple comparisons test	Mean rank diff.	Significant?	Summary	Adjusted P Value
0 vs. 2	-104.1	No	ns	0.1046
0 vs. 4	-108.4	No	ns	0.0601
0 vs. 10	-84.27	No	ns	0.628
0 vs. 15	-125.5	Yes	*	0.0214
0 vs. 20	-102.7	No	ns	0.2773
0 vs. 25	-136.1	Yes	**	0.0088
0 vs. 30	-93.87	Yes	*	0.0393
0 vs. 35	-136	Yes	**	0.0025
0 vs. 40	-84.27	No	ns	0.8273
0 vs. 45	-52.32	No	ns	> 0.9999
0 vs. 50	-13.6	No	ns	> 0.9999
0 vs. 55	-19.35	No	ns	> 0.9999
2 vs. 4	-4.273	No	ns	> 0.9999
2 vs. 10	19.88	No	ns	> 0.9999
2 vs. 15	-21.37	No	ns	> 0.9999
2 vs. 20	1.426	No	ns	> 0.9999
2 vs. 25	-31.91	No	ns	> 0.9999
2 vs. 30	10.28	No	ns	> 0.9999
2 vs. 35	-31.9	No	ns	> 0.9999
2 vs. 40	19.87	No	ns	> 0.9999
2 vs. 45	51.83	No	ns	> 0.9999
2 vs. 50	90.55	No	ns	0.8957
2 vs. 55	84.8	No	ns	> 0.9999
4 vs. 10	24.15	No	ns	> 0.9999
4 vs. 15	-17.1	No	ns	> 0.9999
4 vs. 20	5.699	No	ns	> 0.9999
4 vs. 25	-27.63	No	ns	> 0.9999
4 vs. 30	14.55	No	ns	> 0.9999
4 vs. 35	-27.62	No	ns	> 0.9999
4 vs. 40	24.15	No	ns	> 0.9999
4 vs. 45	56.1	No	ns	> 0.9999
4 vs. 50	94.82	No	ns	0.6046
4 vs. 55	89.07	No	ns	0.7375
10 vs. 15	-41.25	No	ns	> 0.9999
10 vs. 20	-18.45	No	ns	> 0.9999
10 vs. 25	-51.78	No	ns	> 0.9999
10 vs. 30	-9.598	No	ns	> 0.9999
10 vs. 35	-51.77	No	ns	> 0.9999
10 vs. 40	-0.001885	No	ns	> 0.9999
10 vs. 45	31.95	No	ns	> 0.9999
10 vs. 50	70.67	No	ns	> 0.9999
10 vs. 55	64.92	No	ns	> 0.9999
15 vs. 20	22.8	No	ns	> 0.9999
15 vs. 25	-10.54	No	ns	> 0.9999
15 vs. 30	31.65	No	ns	> 0.9999
15 vs. 35	-10.53	No	ns	> 0.9999
15 vs. 40	41.24	No	ns	> 0.9999
15 vs. 45	73.2	No	ns	> 0.9999
15 vs. 50	111.9	No	ns	0.2314
15 vs. 55	106.2	No	ns	0.2796
20 vs. 25	-33.33	No	ns	> 0.9999
20 vs. 30	8.852	No	ns	> 0.9999
20 vs. 35	-33.32	No	ns	> 0.9999
20 vs. 40	18.45	No	ns	> 0.9999
20 vs. 45	50.4	No	ns	> 0.9999
20 vs. 50	89.12	No	ns	> 0.9999
20 vs. 55	83.37	No	ns	> 0.9999
25 vs. 30	42.19	No	ns	> 0.9999
25 vs. 35	0.01058	No	ns	> 0.9999
25 vs. 40	51.78	No	ns	> 0.9999
25 vs. 45	83.74	No	ns	> 0.9999
25 vs. 50	122.5	No	ns	0.1097
25 vs. 55	116.7	No	ns	0.1312
30 vs. 35	-42.18	No	ns	> 0.9999
30 vs. 40	9.596	No	ns	> 0.9999
30 vs. 45	41.55	No	ns	> 0.9999
30 vs. 50	80.27	No	ns	0.738
30 vs. 55	74.52	No	ns	0.8867
35 vs. 40	51.77	No	ns	> 0.9999
35 vs. 45	83.72	No	ns	0.819
35 vs. 50	122.4	No	ns	0.0532
35 vs. 55	116.7	No	ns	0.0617
40 vs. 45	31.95	No	ns	> 0.9999
40 vs. 50	70.68	No	ns	> 0.9999
40 vs. 55	64.92	No	ns	> 0.9999
45 vs. 50	38.72	No	ns	> 0.9999
45 vs. 55	32.97	No	ns	> 0.9999
50 vs. 55	-5.754	No	ns	> 0.9999
